# Supplementary material for: The possible 5.9 years oscillation identification from superconducting gravimeter observations
Source: Copernicus journal article supplement (doi:10.5194/egusphere-2023-202), 2023-02-24
Supplement: Supplementary file [file egusphere-2023-202-AC3-supplement.pdf]

1 We appreciate your comments once more. Our responses to your questions are as follows:

2

3 (1) Previous evidences from different observation data (e.g.,  $\Delta$ LOD, geomagnetic field, GNSS, and  
4 polar motion) have indicated that the SYO in  $\Delta$ LOD is an almost stable oscillation with attenuation  
5 larger than 180. This suggests that the SYO persists throughout the entire LOD observation period  
6 from 1962 to the present. Thus one should use the observations for an extended duration, preferably  
7 in alignment with the  $\Delta$ LOD time, to verify the existence of a steady  $\sim$ 5.9-year fluctuation before  
8 linking it with the SYO in  $\Delta$ LOD. Moreover, an unstable oscillation signal should not be considered  
9 cognate with the SYO in  $\Delta$ LOD, even though there exists the oscillation energy around 5.9 years in a  
10 relatively short time, as observed in Fig. 3 (some stations seem to have signals of  $\sim$ 4-8 years in the SG  
11 time windows). In other word, it is possible to say that the hydrology makes a transient contribution  
12 to  $\Delta$ LOD. This is obviously not true. In addition, if the SYO had been generated by the hydrological  
13 effects, it would have been evident in the hydrologic observation data over an extended time and in  
14 different regions. However, this assertion is contradicted by the findings of Pfeffer et al. (2022) and  
15 Pfeffer & Cazennave et al. (2023). From the wavelet spectra analysis, we think it may be a result of  
16 noise interference, or energy leakage from nearby signals.

17

18 Additionally, you consider it reasonable that the inaccuracy of the current hydrological models is the  
19 reason why the possible SYO peaks in the spectra of the hydrological loading data do not precisely  
20 exactly align with the 5.9 years period. However, it must be founded on a precondition that the SYO  
21 is actually present in the hydrological models. Actually, this precondition has not yet been confirmed  
22 precisely because of the inaccuracy of the hydrological model. Your discussions are obviously illogical.

23

24 (2) Regarding the verifications using global gridded precipitation data, climate indices, GMST, and  
25 GMSL, you both posed questions similar to that in validation using hydrological models. Specifically,  
26 all of these validations should be conducted using smaller time windows as for SGs. It is imperative  
27 to reiterate that it is necessary to use observations for extended durations, preferably in alignment with  
28 the  $\Delta$ LOD time, to ascertain the presence of a stable  $\sim$ 5.9-year fluctuation before establishing a  
29 correlation between it with the SYO in LOD.

30

31 (3) Observing Fig. 4(c) in Rosat & Gillet (2023), an extremely weak 5.9-year signal with an amplitude  
 32 of  $\sim 0.012$  ms is present in the wavelet transform coefficient spectrum of the HAM data. Nevertheless,  
 33 it can be observed that the amplitude is nearly congruent with the background noise level of  $\Delta$ LOD.  
 34 As depicted in Fig. 1, the background noise level of  $\Delta$ LOD after removing the AAM and OAM effects  
 35 is  $\sim 0.01$  ms. It also can be seen in Fig. 1d of Ding (2019, EPSL) and Fig. 1b of Ding et al. (2021, JGR).  
 36 That is to say, despite the presence of a  $\sim 5.9$ -year signal in the hydrology-excited LOD, the associated  
 37 peak is likely to be buried in the background noise (the SNR is very low). Statistically, the signal is  
 38 unreliable.

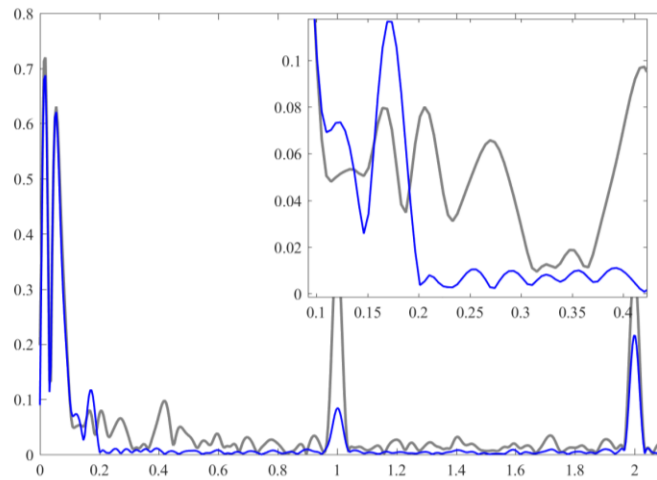

39  
 40 **Figure 1.** The Fourier amplitude spectra of the original  $\Delta$ LOD in 1962-2021 (in gray), and the residual  
 41 (in blue) obtained from the original  $\Delta$ LOD after removing the AAM and OAM effects.

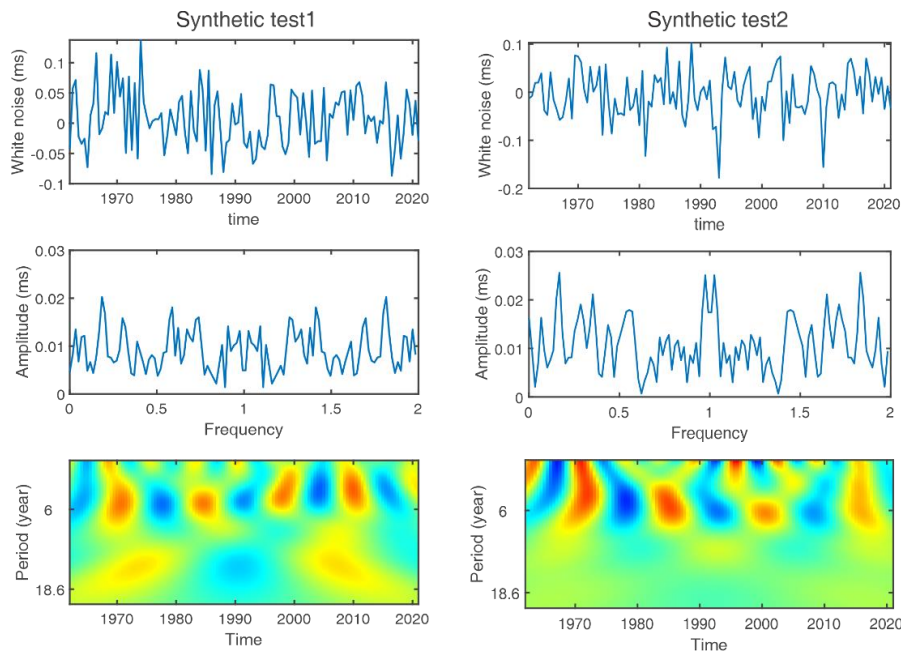

42  
 43 **Figure 2.** The Fourier amplitude spectra and wavelet spectra of two synthetic white noise time series.

44 We also carried out a series of synthetic tests. We simulated the random white noises with the mean  
45 amplitudes equivalent to the background noise level of  $\Delta\text{LOD}$  in Fig. 1, and subsequently conducted  
46 the Fourier and wavelet spectrum analysis on them. Fig. 2 shows two test results for the synthetic white  
47 noises. Obviously, the wavelet spectra display clear  $\sim 6$ -year oscillation signals that are definitely fake,  
48 while the Fourier amplitude spectra do not manifest any noteworthy signal at all.

49

50 Thus, purely from the point of signal analysis, it is reasonable to conclude that the hydrology-excited  
51 LOD time series does not contain the SYO signal. To avoid unnecessary misunderstandings, it may be  
52 more appropriate to rephrase the statement as follows: The HAM effect made very small contributions  
53 to the intradecadal period band in the  $\Delta\text{LOD}$ .

54

55 (4) We disagree your claim about the influences of the terrestrial water storage variations on  $\Delta J_2$ . The  
56 change in the zonal harmonic coefficients  $\Delta J_2$ , of the Earth's gravitational field due to the surface-  
57 water-induced mass redistribution can be calculated by (Chao et al. 1988):

$$58 \Delta J_l(t) = -\frac{R^2 \rho}{M} (1 + k_l') \int [h(\theta, \lambda, t) - \bar{h}(\theta, \lambda)] P_l(\cos \theta) d\Omega \quad (1)$$

59 where  $M$  is the mass of the Earth, and  $P_l$  is the Legendre polynomial of degree  $l$ ;  $k_l'$  are the load Love  
60 numbers;  $\rho = 1 \text{ g m}^{-3}$ ,  $h$  is the equivalent depth of liquid water with average  $\bar{h}$ . The change in  $\Delta\text{LOD}$   
61 due to surface mass redistribution is directly proportional to  $\Delta J_2$ , according to

$$62 \Delta\text{LOD} = \text{LOD}[2MR^2\Delta J_2(t)]/(3C) \quad (2)$$

63 where  $C$  is the moments of inertia about the Earth's polar.

64

65 It can be affirmed that the terrestrial water storage (TWS) variations can result in the C20 variations,  
66 which are directly reflected in  $\Delta\text{LOD}$ . Besides, it is worth noting that Chao and Eanes (1995)  
67 demonstrated global gravitational changes due to atmospheric mass redistribution, which can also  
68 manifest in the C20 variations. Therefore, if an SYO in the TWS variations is observed, it must  
69 appear in  $\Delta J_2$ , and further will be reflected in  $\Delta\text{LOD}$ . However, in our last reply, it has been determined  
70 that there is no observable SYO signal present within  $\Delta J_2$ . Given the stable SYO signal present in  
71  $\Delta\text{LOD}$ , the only explanation is that the SYO signal in  $\Delta\text{LOD}$  does not have any correlation with the  
72 TWS variations.

73 In addition, we have carefully read the relevant results in Meyssignac et al. (2013). You claimed that  
74 “The hydrological content at interannual time-scales is mostly related to degree-2 order-2 geographical  
75 pattern”. This is definitely incorrect. Meyssignac et al. (2013) have clearly indicated that “Variations  
76 in land water storage (hereafter LWS) also play a role in S2,2 variations (see Figure 1c). But both  
77 hydrological models agree to show that the LWS contribution to S2,2 interannual variations is rather  
78 small”, “As a result, C2,2 variations estimated from SLR tracking data and the combination of ocean  
79 mass and LWS contributions are quite different. Nevertheless, we note that both estimations agree on  
80 showing small C2,2 variations”, and “But unlike the ocean mass contribution, they show an important  
81 role of LWS on C2,0 variations over the whole record.” They showed that the hydrological content at  
82 interannual time scales is mostly related to degree-2 order-0 geographical pattern. This is the exact  
83 opposite of what you said.

84

85 Besides, you claimed that “Only a certain distribution of terrestrial water storage variations would  
86 result in  $\Delta J_2$ .” It has no basis at all. According to Chao et al. (2020), “ $J_2$  is the (normalized) zonal  
87 quadrupole of the Earth's density.” “The zonal [degree-2, order-0] component of any mass  
88 redistribution will contribute to the time variation  $\Delta J_2$ . Besides the seasonal water cycle in the surface  
89 geophysical fluids (atmosphere + hydrosphere + cryosphere), a host of geophysical processes cause  
90 mass redistribution on/in the Earth ranging from tides to atmosphere-ocean circulations, to denudation  
91 of glaciers/ice sheets and sea level rise, and to internal phenomena like earthquakes, glacial isostatic  
92 adjustment (GIA), and core flows.”

93

94 (5) The revised manuscript will present the results of implementing AR-z into some better hydrological  
95 models like ERA5\_land.

96

97 (6) As demonstrated in our last reply, both current global hydrological models and global precipitation  
98 data do not indicate the presence of a stable and consecutive ~5.9-year oscillation. To verify the local  
99 contribution of hydrological mass changes, we can only use the in-suit groundwater level data from a  
100 few SG stations to to illustrate it. Fig. 3 shows the Fourier amplitude spectra of six groundwater level  
101 records, indicating no ~5.9-year signal exists. To get the accurate local contribution of hydrological  
102 mass changes, more extensive global in-suit hydrological observations (including precipitation and

103 soil moisture) should be joint for comprehensive verification in the future.

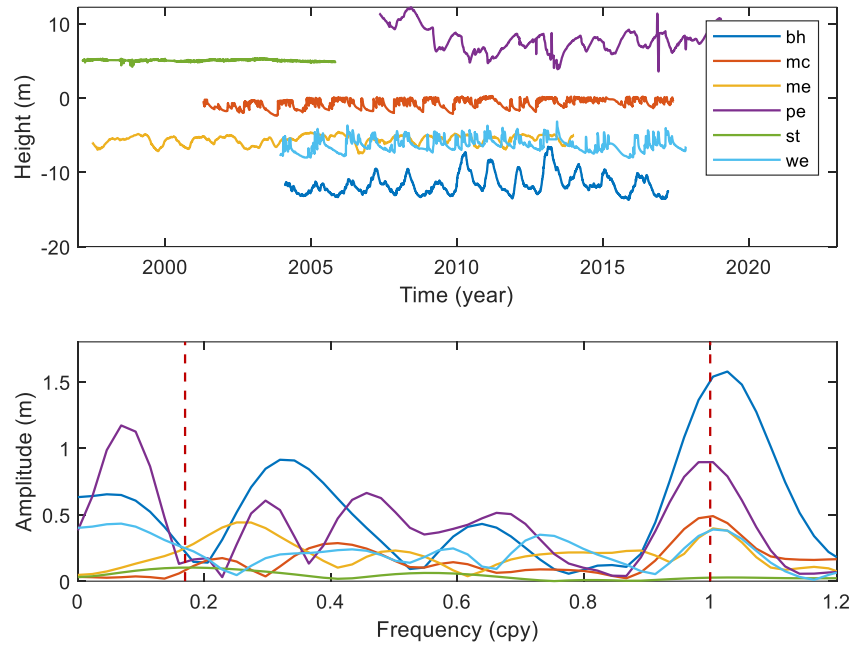

104  
105 **Figure 3.** The Fourier amplitude spectra of six groundwater level records.  
106

107 (7) Indeed, as you said, the pre-processing process, especially the repair of gaps and steps, is the main  
108 challenge to detect long-period signals using SG data. Manual corrections using Tsoft will lead to  
109 significant differences of the Fourier spectra results due to operational differences. So it is not  
110 surprising that you observed the 4-yr, 5-yr, or 7-yr periodic signals in different SG residual series. To  
111 address this unavoidable problem, we have conducted a very careful pre-processing work (see Fig.1  
112 in the manuscript) and analyzed the errors of step corrections (see our Supplement).

113  
114 You found the SYO clearly for Strasbourg and Metsahovi with a nice anti-correlation with the  
115 hydrological loading. In fact, thus good negative correlations were also observed by us. However, it is  
116 not sufficient to prove that there is an anti-phase SYO in hydrology corresponding to that in the SG  
117 residuals. Because we have verified that there are irregular fluctuations at ~4-8 years in the  
118 hydrological model data, which makes the time series appear to be inversely approximate to the long-  
119 period fluctuations in the SG residuals.

120  
121 In addition, we can only obtain the SG data with lengths about 3-4 cycles of the SYO period, which  
122 are enough to describe the SYO information. Any unreasonable step correction (very different from

123 the actual situation) will cause a significant deviation of the SYO spectral peak in the Fourier spectrum.

124

## 125 **References**

126 Chao, B. F. and O'Connor, W. P.: Global surface-water-induced seasonal variations in the Earth's  
127 rotation and gravitational field, *Geophysical Journal*, 94, 263-270, 1988.

128 Chao, B. F. and Eanes, R.: Global gravitational changes due to atmospheric mass redistribution as  
129 observed by the Lageos nodal residual, *Geophys. J. Int.*, 122, 755-764, 1995.

130 Chao, B. F., Yu, Y., & Chung, C. H.: Variation of Earth's oblateness  $J_2$  on interannual-to-decadal  
131 timescales. *J. Geophys. Res.: Solid Earth*, 125, e2020JB019421, [https://doi.org/10.1029/](https://doi.org/10.1029/2020JB019421)  
132 [2020JB019421](https://doi.org/10.1029/2020JB019421), 2020.

133 Ding, H.: Attenuation and excitation of the ~6-year oscillation in the length-of-day variation, *Earth*  
134 *363 Planet. Sci. Lett.*, 507, 131-139, <https://doi.org/10.1016/j.epsl.2018.12.003>, 2019.

135 Ding, H., An, Y., and Shen, W.: New evidence for the fluctuation characteristics of intradecadal  
136 periodic signals in length-of-day variation, *J. Geophys. Res. Solid Earth*, 126, e2020JB020990,  
137 [366 https://doi.org/10.1029/2020JB020990](https://doi.org/10.1029/2020JB020990), 2021

138 Meyssignac, B., Lemoine, J. M., Cheng, M., Cazenave, A., Gégout, P. and Maisongrande, P.:  
139 Interannual variations in degree-2 Earth's gravity coefficients  $C_{2,0}$ ,  $C_{2,2}$ , and  $S_{2,2}$  reveal large-  
140 scale mass transfers of climatic origin, *Geophys. Res. Lett.*, 40, 4060-4065,  
141 <https://doi.org/10.1002/grl.50772>, 2013.

142 Rosat, S. , and Gillet, N.: Intradecadal variations in length of day: Coherence with models of the  
143 Earth's core dynamics, *Phys. Earth Planet. Inter.*, 41, 107053, 2023.

144
