# Supplementary material for: The possible 5.9 years oscillation identification from superconducting gravimeter observations
Source: Copernicus journal article supplement (doi:10.5194/egusphere-2023-202), 2023-02-24
Supplement: Supplementary file [file egusphere-2023-202-AC4-supplement.pdf]

# Response to Referee #2

## 1 General comments

The paper raises the interesting question if a 5.9 year oscillation (SYO) observed in other geodetic time series, can also be detected in SG data. I think this is a relevant question and it might help to interpret the origin of such an oscillation.

The authors come to the conclusion, that they can detect SOY signals in the data and estimate their amplitudes and phases.

However, the preprocessing of the data, especially the correction of instrumental disturbances, is very critical, when analysing very long time series of SG data. Especially, for the step correction I have doubts if the methods used in this paper are completely valid. Some of the methods also need more explanation. Further, the accuracy of these corrections might be overestimated by the authors, which highly affects the detection and the interpretation of the 5.9 year oscillation with the small amplitude of  $5 \text{ nm/s}^2$  to  $9 \text{ nm/s}^2$ .

Further, as highly discussed between the authors and Reviewer 1, the origin of such an oscillation might still be debatable. As I see my expertise rather in the processing of SG data, I don't want to add many comments to this discussion.

**Response:** We appreciate your valuable comments and suggestions that may lead to significant improvements of the manuscript. As previously discussed with Reviewer 1, in this study, there are two questions that really deserve in-depth investigation: (1) Dose the SYO originate from an internal or external source? (2) How to conduct the reasonable SG data pre-processing, especially for repairs of data steps and gaps, which will seriously affect the retrieval of annual-to-decadal fluctuations? Regarding Question (1), we had detailed discussions with Reviewer 1, and we were greatly inspired. Regarding Question (2), we had preliminary discussions with Reviewer 1, and we also emphasized that we had taken great care in the pre-processing work to ensure the correctness of the SYO signal extraction. Here, we will provide a detailed response to your comments related to Question (2).

## 27 **2 Specific comments**

### 28 **2.1 Data source**

29 I would like to comment on the confusion about the “h2” database of IGETS.

30 For most of the stations in the IGETS database three different kinds of Level 2 data exist. They are  
31 specified by the code in the ending of their filename: 22.gpp, 32.gpp and h2.gpp. The meaning of the  
32 code “22” and “h2” is documented by Voigt et al. (2016). The procedure to produce the “32”-data is  
33 explained by Boy et al. (2023), however the code “32” is only mentioned by Boy (2022).

34 The “22”-files should contain data with a sampling interval of 1 min, where gaps and disturbances are  
35 filled with synthetic data and offsets are adjusted, but it seems (see below) that this is at least not true  
36 for big gaps and big offsets. The “h2” files contain hourly sampled data, but Voigt et al. (2016) do not  
37 specify which kind of preprocessing was performed. The comparison below indicates that it is the  
38 same as for the “22” files.

39 The preprocessing for “22” and “h2” data is done at UFP (University of French Polynesia).

40 The “32” files are produced by EOST (Ecole et Observatoire des Sciences de la Terre). They contain  
41 data with a sampling interval of 1 min, where gaps are filled and offsets are adjusted.

42 To clarify, I provide a comparison of the calibrated Level 1 data and all kinds of Level 2 data for the  
43 year of 2006 and the gravimeter SG026 at Strasbourg. It is shown in Figure 1. It can be seen that the  
44 data spikes in November were removed in all versions of level 2 data. All gaps were filled and steps  
45 were adjusted in the “32”-data, while this is not the case for “22” and “h2” data. From visual inspection  
46 the “h2” seems to be a downsampled version of “22” data.

47 As you use your own method to adjust steps, I think it is reasonable that you use a data set, where steps  
48 were not adjusted before, which might be the case for “h2” data although it is stated differently by  
49 Voigt et al. (2016). In line 86 of your manuscript you mention that you also removed spikes. Does this  
50 mean that there were remaining spikes in the “h2” data that you removed on your own? Please clarify  
51 on this. If you anyway correct spikes and steps on your own, I think the safest option would be to use  
52 the level 1 data. Then you would know that no preprocessing was done and an uncertainty about the  
53 preprocessing done by IGETS cannot influence your results.

54 Please clarify in your manuscript which datasets from IGETS you use (level and code) and which  
55 preprocessing steps were done by IGETS.

56 **Response:** We fully endorse your description of the data set published by IGETS. Indeed, there are  
57 some differences between the actual published SG data and declaration by Voigt et al. (2016),  
58 especially for the Level 2 products. Voigt et al. (2016) and Boy et al. (2019) claimed that the Level 2  
59 products are the data corrected for gaps, spikes, and steps. Actually, it is not true for big gaps and big  
60 offsets (you mentioned above too). That is where we get confused. We used the “h2” data, focusing  
61 on the corrections of big gaps and big steps, and with no correction of spikes. We are very sorry for  
62 our mistake, that caused your misunderstanding. The corrections of the spikes from the raw data to  
63 “h2” has been almost completely conducted.

64 Indeed, as you said, the most reasonable pre-processing way is to start with the “00” data, and the  
65 integrity of the data can be guaranteed. We initially did consider using the “00” data; however, the  
66 implementation proved to be exceedingly challenging. The minutely “00” data are riddled with  
67 numerous spikes, gaps, and steps, which are from the instrument problems and environmental effects.  
68 The method of IGETS to remove part of them by filling with synthetic data should be a relatively  
69 simple and reasonable way at present. Therefore, we ended up using the “h2” data, with the elimination  
70 of most of gaps, spikes, and steps in the IGETS processes with synthetic tides. However, some big  
71 steps were retained. That is what we focused on analyzing. We were very careful in repairing the steps,  
72 and we also did the error analysis to ensure the reliability.

73 In the revised manuscript, we will add more description related to the used SG dataset, including data  
74 information and preprocessing steps were done by IGETS, according to your suggestion.

75

## 76 **2.2 Step correction**

77 I have some questions and comments on your step detection and step size determination process.

78 First, I consider it a new and interesting idea to estimate the step sizes by fitting the data to the polar  
79 motion times series. I have not seen this approach before. However, I have some doubts if it is  
80 completely valid.

81 ...

82 Therefore, I would propose to estimate the size of the steps, and all amplitudes and phases of the  
83 periodic signals at the same time. Otherwise you have to justify, why your method is still valid, or, if  
84 it is not completely valid, how big the errors are introduced by using it anyway.

85 Further, please also explain the method in more detail in your paper. As you write in the end of the  
86 paper, the best would be to also include absolute gravity measurements in the step size and drift  
87 estimation.

88 For the smaller steps you use a second method to find and remove them, which is explained in the  
89 supplementary material. From there it is very clear what you did to get to the green curve in Figure  
90 S2(c). However, please explain how you determine the step times and sizes from the green curve. This  
91 is not clear.

92 Especially, for the bigger steps in SG data a problem in estimating their size is that they often occur  
93 together with data gaps and that sometimes a running-in behaviour of the data occurs after the step.  
94 How is the accuracy of your step removing procedures influenced by this problem?

95 Beside the question if and how hydrology needs to be removed, the step correction is the biggest  
96 uncertainty in your data processing. Therefore, I appreciate that you analyse the influence of errors in  
97 the step corrections on your results. However, how do you come to the conclusion, that continuous  
98 downward steps cause the maximal amplitude deviation? I did a synthetic test similar to the one you  
99 present in the supplementary material, but for a mixture of upward and downward steps: I simulate a  
100 synthetic time series containing white noise with a standard deviation of  $10 \text{ nm/s}^2$  (Figure 2(a)), six  
101 steps of  $4 \text{ nm/s}^2$ , which are upward and downward (Figure 2(b)) and a SOY signal with a period of 5.9  
102 years and an amplitude of  $6 \text{ nm/s}^2$  (Figure 2(c)). To simplify the synthetic test, I only estimated the  
103 amplitude of the SOY in the synthetic dataset with a linear least squares estimation and assumed the  
104 phase to be known. The simulated time series, the input SYO signal and the estimated SYO signal are  
105 shown in Figure 2(c). The estimated amplitude of SYO in the synthetic data is  $8.1 \text{ nm/s}^2$ , which means  
106 a deviation of more than  $2 \text{ nm/s}^2$  from the input value. It is possible that the deviation is even bigger  
107 for other configurations. This test should just show that the deviation can be bigger than  $1.8 \text{ nm/s}^2$ .  
108 Furthermore, your synthetic test is only meaningful, if you can be sure that errors in your step

109 determination and step correction process are not bigger than  $4 \text{ nm/s}^2$ . How did you come to this  
110 estimate?

111 In conclusion, I think the accuracy of the step correction might be overestimated. This leads to an  
112 underestimation of the errors of the SOY signal's amplitudes and phases, which finally affects the  
113 interpretation of the SOY signal.

114 **Response:** Many thanks for the detailed mathematical formula explanation. In accordance with the  
115 equation (1) you have presented, it is indeed the most rigorous approach to consider all potential steps  
116 throughout the entirety of the data analysis period. This entails estimating the sizes of the steps, as well  
117 as the amplitudes and phases of the periodic signals concurrently. However, the current operational  
118 approach is impractical, because of the existence of numerous gaps within the time series, thereby  
119 dividing the data series into distinct segments. Hence, we first identified the suitable segments based  
120 on the presence of gaps, and then piecewise fit the  $\text{PM}+\Delta\text{LOD}$  series to the SG residual data (which  
121 has been subjected to filtering and smoothing) one by one. In this process we used an iterative search  
122 method. Given the relatively short time span of approximately 20 years, it is reasonable to approximate  
123 the long-term fluctuation as a linear trend and incorporate it into the fitting procedure. Naturally, this  
124 methodology falls short of attaining the level of rigor you have described, but this approach just serves  
125 as a preliminary correction, primarily targeting significant gaps that are readily discernible to the  
126 unaided eye. Considering the need for small step correction in the next step, it is possible that the  
127 current correction, although imperfect, can be adjusted in subsequent correction. Besides, it is worth  
128 mentioning that we also employed the TSAalyzer software developed by Wu et al. (2017), which is  
129 used for preprocessing the GPS data. This software is commonly utilized for correcting significant  
130 steps in the initial stages. However, the outcomes obtained from this approach were not as satisfactory  
131 as our current method. The small steps were identified according to the average fluctuations before  
132 and after a suspected step with respect to the overall fluctuation during the analysis segment. The  
133 process will be elucidated further in the subsequent revision.

134 For the synthetic test, we found the reason for the difference between our synthesis result and yours.  
135 It is mainly attributed to the different time points of the first step we two set. We chose the same step  
136 occurrence time as you, and got the same result as you. Hence, we redesign a random synthesis test,  
137 which makes the input white noise (with a noise level near or lower than those of the SG residuals)

138 random, the initial input SYO phase random, the input step occurrence time random in every half SYO  
139 cycle, and the input step rise or fall random in every half SYO cycle. Under these conditions, we  
140 conduct 1000000 random trials for the simulated data within 18, 21 and 24 years (corresponding to 6,  
141 7, and 8 steps of  $4 \text{ nm/s}^2$ ), and calculate the deviation values of the amplitude and phase between the  
142 input and retrieved SYO (see an example in Figure R1). The statistical result shows that: 1) The  
143 percentages of the deviations less than  $0.3 \mu\text{Gal}$  are more than 99.5% for all three data lengths; 2) The  
144 percentages of the deviations less than  $0.2 \mu\text{Gal}$  are about 95%, 96%, and 97% respectively for all  
145 three data lengths; 3) The phase deviations are less than  $0.15\pi$ . The results also shows that the longer  
146 the data length is, the less interference the steps have on the retrieval of the SYO. Therefore, from a  
147 statistical point of view, we believe the residual offsets may affect the observed  $\sim 5.9$  years signal for  
148 the amplitude less than  $0.2 \mu\text{Gal}$ .

149 We sincerely appreciate you repeating the synthesis test and alerting us to the test's flaw, and we will  
150 modify the synthesis test and its relevant explanation in the revised supplementary material and  
151 manuscript. Some clarification you proposed will be also added in the revised manuscript.

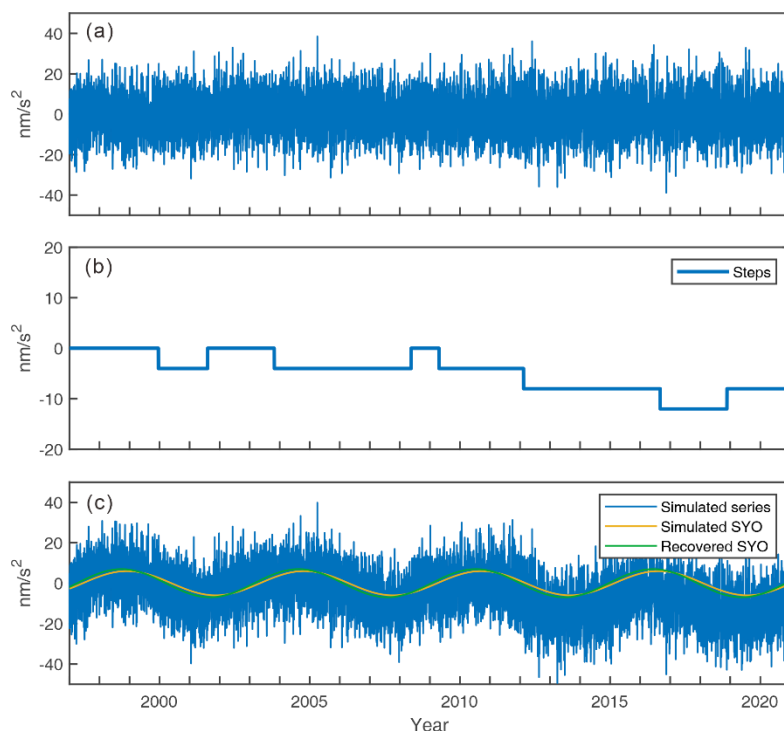

152

153 **Figure R1.** Synthetic test for the effect of small steps on the SYO signal retrieval. (a) shows the  
154 simulated noise series, (b) shows the input steps, and (c) shows the simulated SOY, the simulated time  
155 series and the recovered SOY.

## 156 **2.3 Spectra**

157 You emphasise the better frequency resolution of the AR-z spectra compared to Fourier spectra. I agree  
158 that the frequency resolution of the Fourier spectra of  $1/T \approx 0.5$  cpy is not enough to resolve signals in  
159 the 3-5 year band, the 8.5-18.6 year band or the SYO. Is it possible to quantify the frequency resolution  
160 of the AR-z spectra. If yes, please do so. This would help to know the accuracy of your determined  
161 frequencies.

162 Did you use any taper to compute the Fourier spectra? If yes, please specify.

163 **Response:** When applying the AR-z spectra method, we typically densify our spectral spacing by a  
164 factor of 3 (or 5) over the Fourier elementary spacing. It requires the calculation of discrete Fourier  
165 transforms in the AR solution, which in turn can be efficiently done by FFT with zero-padding (see  
166 details in Ding & Chao, 2015, GJI). We used the Hanning taper to compute the Fourier spectrum. The  
167 relevant information will be added in the revised manuscript.

168

## 169 **2.4 Retrieval of the SYO signal**

170 How do you finally obtain the periods of the SOY ranging from 5.84 to 5.92 years? (Line 188-189).  
171 Do you read them from the Morlet wavelet spectra or from the AR-z spectra? In Figure 5 you give  
172 uncertainties for these periods. How did you obtain them? Please specify.

173 For the same reasons as disused in Section 2.2, I think the estimates for amplitudes and phases of the  
174 SOY signal would be more stable, if you estimate them together with the amplitudes and phases of all  
175 the other periodic signals.

176 **Response:** The SYO period value was obtained by the Lorentz fitting estimation of the Fourier  
177 spectrum peak of the SYO after removing other long-period signals by least-squares fitting. The  
178 uncertainty is the estimation error, which is related to the background noise level.

179 We agree with the method that you suggested, and we have even experimented with it. However, in  
180 order to determine the estimated uncertainty, we ultimately employed the approach of initial  
181 elimination followed by fitting. The validity of this approach was further validated through simulation

182 experiments. Please see Materials and Methods 3 in our Supplement.

183

## 184 **2.5 18.6 year period**

185 In the conclusion you claim you have identified an 18.6 year period in the SG data. However, in the  
186 Section 'Spectral analysis' you state correctly that the data length is too short to identify this oscillation.

187 **Response:** We appreciate you pointing out our significant mistake. The accurate determination of the  
188 signals within the entire 8.5-18.6 band is indeed lacking. The statement made in this context is incorrect,  
189 and it will be modified in the revised manuscript.

190

## 191 **2.6 Origin of the SYO**

192 It is not clear to me, why you think the SYO should originate from the Earth core. Even if you can  
193 exclude external and loading sources, why do you think the SOY more likely originates from the core  
194 than for example from the mantle?

195 **Response:** We must first demonstrate that the SYO is a long-period fluctuation on a global scale. So  
196 far, the discussions about the origins of thus Earth's interannual-to-decadal fluctuations mainly focuses  
197 on the surface process or deep interior dynamics, and the evidence from the solid mantle is very little.  
198 A large number of surface load observation data can provide the interpretation of some interannual  
199 signals; Other long-period signals that cannot be explained by the surface loads (see Ding, 2019, EPSL,  
200 for examples) are mostly attributed to the dynamic processes of the Earth's core, which are often  
201 controversial because the structure of the Earth's core is not well understood.

202 In this study, our main objective was to provide evidence from surface gravity monitoring, which is  
203 different from previous evidence from satellite observations (e.g., SLR and GRACE), for the core  
204 origin interpretation of the SYO. Here we are trying to find a more reasonable interpretation for our  
205 SYO gravity observations. Our core idea is that the SYO signal in  $\Delta$ LOD is driven by core processes.  
206 The 6-year related gravity changes, which may include core motions and some unknown 6-year  
207 changes due to strong coupling interactions between the mantle and core. Namely, the 6-year related  
208 surface gravity changes may be the result of a superposition of multiple internal motions in the Earth's



209 coupling layers.

210

### 211 **3 Technical corrections**

212 Line 32-46: A non-expert to core dynamics would have big difficulties to understand the basic ideas  
213 of this paragraph. In my opinion this would be fine for a paragraph in the discussion part. For an  
214 introduction, however, I think the basic ideas should also be understood by non expert readers. So it  
215 would be helpful if you could rewrite this paragraph in a less technical way.

216 **Response:** Previous discussions about the origin of SYO have mainly focused on the dynamic  
217 processes of the Earth's core, which are currently controversial. In this paragraph, we mainly wanted  
218 to briefly introduce some of the current conjectures or explanations for the SYO excitation mechanism.  
219 In the process of revision, we will carefully revise this paragraph with reference to your suggestions  
220 for the convenience of readers.

221

222 Line 49: (PM, Ding et al. 2019, 2021; Chen et al. 2019)→ (PM) (Ding et al. 2019, 2021; Chen et al.  
223 2019). The same applies to line 51.

224 **Response:** Thank you very much for the technical correction. We have modified as follows: “In recent  
225 years, the fluctuation characteristics and excitations of the SYO have also been investigated using  
226 some continuous and long-span geophysical/geodetic observations, including the polar motion (PM)  
227 (Ding et al., 2019, 2021; Chen et al., 2019), GPS (Global Positioning System) displacements (Ding  
228 and Chao, 2018a; Watkins et al., 2018; Rosat et al., 2021), geomagnetic fields (Ding and Chao, 2018a),  
229 and gravity-field satellite laser ranging (SLR) (Chao and Yu, 2020; Rosat et al., 2021).”

230

231 Line 181: You write that you are fitting 8 harmonics: ~18.6/13.5, ~8.5, ~4.2, ~3.65, ~3.2, ~2.6, ~2 and  
232 ~1 year. What does '~' mean in this context? As I understand, you estimate the amplitudes and the  
233 frequencies by the fitting procedure, while the frequencies are fixed? If this is the case, which are the  
234 exact frequencies you are using? What do you mean by 18.6/13.5? Do you use both frequencies? Is it  
235 one frequency for each station?

236 **Response:** Here '~' refers to the meaning of 'about'. No special meaning! All these frequencies are

237 from the estimated values using the AR-z method in this study and previous empirical values (see our  
238 Section 3 in the manuscript). We were just keeping them one decimal place or two decimal places.  
239 This is true of all same symbols throughout the text. All these fixed frequencies associated with their  
240 cosine functions were used to fit each SG residual time series, to obtain their corresponding amplitudes  
241 and phases. Since the time is too short, we could not distinguish the peak with the period over 10 years,  
242 which may come from the overlap of adjacent spectral peaks. According previous empirical values,  
243 we chose two more reasonable values of 18.6 and 13.5 years to fit the peak regarded as a quasi-periodic  
244 oscillation. In practical fitting applications, we will prefer the value of 18.6 or 13.5 years or both, to  
245 achieve the best fitting of the SG time series from the perspective of the Fourier spectrum.

246

247 Line 259: When talking about pressure changes, are these air pressure changes or pressure changes  
248 inside the Earth? Please clarify.

249 **Response:** The pressure here refers to the non-hydrostatic pressure on the core-mantle boundary from  
250 the liquid outer core (Please see Dumberry, 2010, GJI). We will clarify it in the revised manuscript.

251

## 252 **References**

253 Ding, H.: Attenuation and excitation of the ~6-year oscillation in the length-of-day variation, Earth  
254 Planet. Sci. Lett., 507, 131-139, <https://doi.org/10.1016/j.epsl.2018.12.003>, 2019.

255 Ding, H. and Chao, B. F.: Detecting harmonic signals in a noisy time series: The z-domain  
256 autoregressive (AR-z) spectrum, Geophys. J. Int., 201(3), 1287-1296,  
257 <https://doi.org/10.1093/gji/ggv077>, 2015.

258 Dumberry, M.: Gravity variations induced by core flows, Geophys. J. Int., 180(2), 635-650,  
259 <https://doi.org/10.1111/j.1365-246X.2009.04437.x>, 2010.

260 Wu, D., Yan, H. and Shen, Y.: TSAAnalyzer, a GNSS time series analysis software, GPS Solut., 21,  
261 1389-1394, <https://doi.org/10.1007/s10291-017-0637-2>, 2017.

262

263
